# Supplementary material for: DFT-based microkinetic studies on methanol synthesis from CO2 hydrogenation over In2O3 and Zr–In2O3 catalysts
Source: Royal Society of Chemistry journal article supplement (doi:10.1039/d3cp00831b), 2023-01-01
Supplement: d3cp00831b1.pdf [file d3cp00831b1.pdf]

**Electronic Supplementary Information**

**DFT-based microkinetic studies on methanol synthesis from CO<sub>2</sub>  
hydrogenation over In<sub>2</sub>O<sub>3</sub> and Zr-In<sub>2</sub>O<sub>3</sub> catalysts<sup>†</sup>**

Kun Li,<sup>abc</sup> Zhangqian Wei,<sup>ab</sup> Qingyu Chang,<sup>\*a</sup> Shenggang Li<sup>\*abc</sup>

<sup>a</sup> *CAS Key Laboratory of Low-Carbon Conversion Science and Engineering, Shanghai Advanced Research Institute, Chinese Academy of Sciences, 100 Haik Road, Shanghai 201210, China.*

<sup>b</sup> *School of Physical Science and Technology, ShanghaiTech University, Shanghai 201210, China*

<sup>c</sup> *University of Chinese Academy of Sciences, Beijing 100049, China*

\* E-mail addresses: *changqy@sari.ac.cn* (Q. Chang), *lisg@sari.ac.cn* (S. Li)

**Table S1** Elementary reactions considered for CO<sub>2</sub> conversion to methanol on In<sub>2</sub>O<sub>3</sub>(110) and Zr-In<sub>2</sub>O<sub>3</sub>(110) surface in microkinetic analysis performed with CatMAP, with further details of the adsorption sites.

|     |                                                                                                                                           |
|-----|-------------------------------------------------------------------------------------------------------------------------------------------|
| R1  | CO <sub>2_g</sub> + * <sub>s</sub> -> CO <sub>2*_s</sub> #ln-CO2                                                                          |
| R2  | CO <sub>2_g</sub> + * <sub>s</sub> -> O <sub>2C_s</sub> #bt-CO2                                                                           |
| R3  | CO <sub>2_s</sub> + H <sub>t</sub> -> CO <sub>2H_s</sub> + * <sub>t</sub>                                                                 |
| R4  | CO <sub>2H_s</sub> <-> CO <sub>2-H_s</sub> -> HCOO <sub>s</sub>                                                                           |
| R5  | HCOO <sub>s</sub> + H <sub>t</sub> -> HHCOO <sub>s</sub> + * <sub>t</sub>                                                                 |
| R6  | HCOO* <sub>s</sub> + H* <sub>t</sub> <-> H-HCOO* <sub>s</sub> + * <sub>t</sub> -> H <sub>2</sub> COO* <sub>s</sub> + * <sub>t</sub>       |
| R7  | HHCOO <sub>s</sub> <-> HCOO-H <sub>s</sub> -> H <sub>2</sub> COO <sub>s</sub>                                                             |
| R8  | H <sub>2</sub> COO <sub>s</sub> <-> O-CH <sub>2</sub> O -> OH <sub>2</sub> CO <sub>s</sub>                                                |
| R9  | OH <sub>2</sub> CO <sub>s</sub> + 2H <sub>t</sub> -> OH <sub>2</sub> COHH <sub>s</sub> + 2* <sub>t</sub>                                  |
| R10 | OH <sub>2</sub> COHH <sub>s</sub> <-> OH <sub>2</sub> COH-H <sub>s</sub> -> OH <sub>3</sub> COH <sub>s</sub>                              |
| R11 | OH <sub>3</sub> COH <sub>s</sub> -> OCH <sub>3</sub> OH <sub>s</sub>                                                                      |
| R12 | OCH <sub>3</sub> OH <sub>s</sub> -> CH <sub>3</sub> OH <sub>g</sub> + O <sub>s</sub>                                                      |
| R13 | O <sub>2</sub> C <sub>s</sub> + H <sub>t</sub> <-> O <sub>2</sub> C-H <sub>s</sub> + * <sub>t</sub> -> COOH <sub>s</sub> + * <sub>t</sub> |
| R14 | COOH <sub>s</sub> <-> CO-OH <sub>s</sub> -> COHO <sub>s</sub>                                                                             |
| R15 | COHO <sub>s</sub> + * <sub>s</sub> -> CO <sub>s</sub> + OH <sub>s</sub>                                                                   |
| R16 | CO <sub>s</sub> -> CO <sub>g</sub> + * <sub>s</sub>                                                                                       |
| R17 | H <sub>2_g</sub> + 2* <sub>t</sub> <-> H-H <sub>t</sub> + * <sub>t</sub> -> H <sub>t</sub> + H <sub>t</sub>                               |
| R18 | OH <sub>s</sub> + H <sub>t</sub> <-> H-OH <sub>s</sub> + * <sub>t</sub> -> H <sub>2</sub> O <sub>s</sub> + * <sub>t</sub>                 |
| R19 | H <sub>2</sub> O <sub>s</sub> -> H <sub>2</sub> O <sub>g</sub> + * <sub>s</sub>                                                           |
| R20 | OH <sub>s</sub> + * <sub>t</sub> -> O <sub>s</sub> + H <sub>t</sub>                                                                       |

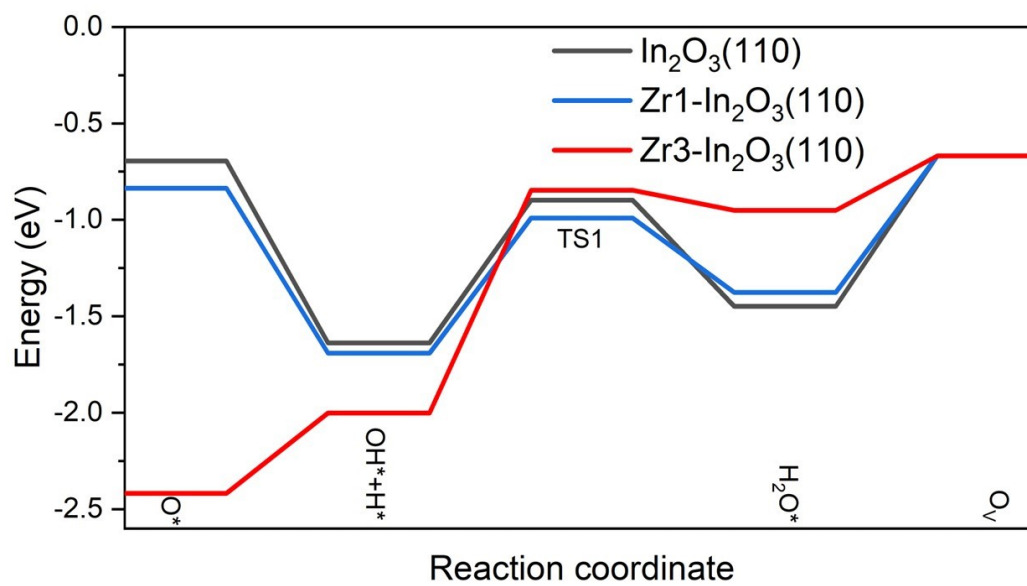

**Fig. S1** Potential energy surfaces for H<sub>2</sub>O formation on the In<sub>2</sub>O<sub>3</sub>(110) and Zr-In<sub>2</sub>O<sub>3</sub>(110) surfaces.

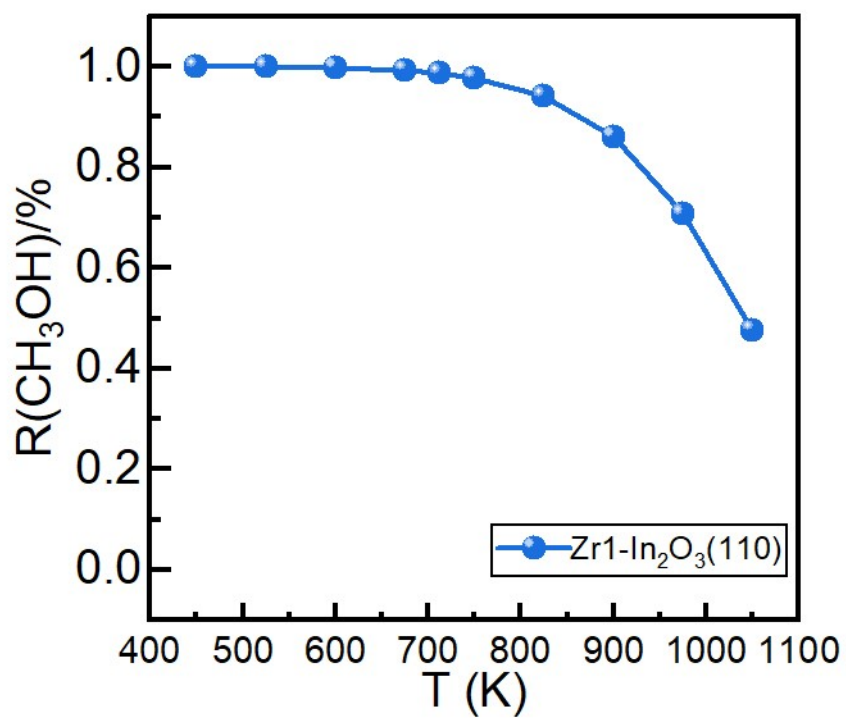

**Fig. S2**  $\text{CH}_3\text{OH}$  selectivity on the  $\text{Zr1-In}_2\text{O}_3(110)$  surface as a function of temperature at  $P = 50$  MPa. Simulation conditions:  $\text{CO}_2 : \text{H}_2 = 1 : 3$ .

**Table S2** Optimized fractional coordinates of  $\text{In}_2\text{O}_3(110)$  surface.

O In

|                    |                    |                    |
|--------------------|--------------------|--------------------|
| 1.000000000000000  |                    |                    |
| 10.213699999999993 | 0.000000000000000  | 0.000000000000000  |
| 0.000000000000009  | 14.444300000000001 | 0.000000000000000  |
| 0.000000000000010  | 0.000000000000010  | 15.987399999999992 |

O In

48 32

Direct

|                    |                    |                    |
|--------------------|--------------------|--------------------|
| 0.6079977758159562 | 0.1825443267066757 | 0.4362712132315722 |
| 0.1079977758159491 | 0.6825443267066685 | 0.4362712132315722 |
| 0.1088358797402761 | 0.9647164686301137 | 0.4544776404754274 |
| 0.6088358797402832 | 0.4647164686301211 | 0.4544776404754274 |
| 0.3237697993724533 | 0.5823222352526369 | 0.3458009054715419 |
| 0.8237697993724530 | 0.0823222352526370 | 0.3458009054715419 |
| 0.8249436211383252 | 0.5647822957564071 | 0.5361659930409042 |
| 0.3249436211383254 | 0.0647822957564142 | 0.5361659930409042 |
| 0.1004400036094762 | 0.9670707940212659 | 0.6664946814505766 |
| 0.6004400036094764 | 0.4670707940212659 | 0.6664946814505766 |
| 0.3276869710058980 | 0.8186750267869800 | 0.3452316937746626 |
| 0.8276869710059048 | 0.3186750267869800 | 0.3452316937746626 |
| 0.6035619394263214 | 0.6845843913661551 | 0.6839007798607878 |
| 0.1035619394263144 | 0.1845843913661551 | 0.6839007798607878 |
| 0.8347969046942195 | 0.3285776837991363 | 0.5396039931430473 |
| 0.3347969046942196 | 0.8285776837991363 | 0.5396039931430473 |
| 0.5592863488620317 | 0.6966328822454846 | 0.4602896482808987 |
| 0.0592863488620316 | 0.1966328822454846 | 0.4602896482808987 |

|                    |                    |                    |
|--------------------|--------------------|--------------------|
| 0.3876122828260632 | 0.0664155913604292 | 0.3195694488287623 |
| 0.8876122828260632 | 0.5664155913604222 | 0.3195694488287623 |
| 0.8749496178167006 | 0.0848903445515157 | 0.5594122645940717 |
| 0.3749496178166936 | 0.5848903445515086 | 0.5594122645940717 |
| 0.0591186490129696 | 0.4582472575521438 | 0.4418050676606413 |
| 0.5591186490129697 | 0.9582472575521440 | 0.4418050676606413 |
| 0.7976330763916604 | 0.2150198092098662 | 0.6903864507322498 |
| 0.2976330763916602 | 0.7150198092098591 | 0.6903864507322498 |
| 0.3115778210851878 | 0.4369385927663886 | 0.6815715884936553 |
| 0.8115778210851878 | 0.9369385927663886 | 0.6815715884936553 |
| 0.0963980041237094 | 0.3204479613229509 | 0.3135665666295812 |
| 0.5963980041237166 | 0.8204479613229581 | 0.3135665666295812 |
| 0.6084134801500255 | 0.8387169682347516 | 0.5758531430938664 |
| 0.1084134801500187 | 0.3387169682347519 | 0.5758531430938664 |
| 0.3327131938999144 | 0.4271886940543347 | 0.4593564361655760 |
| 0.8327131938999216 | 0.9271886940543276 | 0.4593564361655760 |
| 0.0906674283111391 | 0.0851412654712250 | 0.3110657182851373 |
| 0.5906674283111463 | 0.5851412654712179 | 0.3110657182851373 |
| 0.8291825599120484 | 0.7201845316407166 | 0.4358753052974278 |
| 0.3291825599120411 | 0.2201845316407238 | 0.4358753052974278 |
| 0.5968032405721470 | 0.0704413647463528 | 0.5842425191753895 |
| 0.0968032405721470 | 0.5704413647463528 | 0.5842425191753895 |
| 0.8737484761954306 | 0.6978499485243175 | 0.6700211219651597 |
| 0.3737484761954236 | 0.1978499485243174 | 0.6700211219651597 |
| 0.0302999243576119 | 0.8341367143849905 | 0.3222813343887312 |
| 0.5302999243576120 | 0.3341367143849976 | 0.3222813343887312 |
| 0.5577475925375229 | 0.3124571581123852 | 0.5632518436056515 |

|                    |                    |                    |
|--------------------|--------------------|--------------------|
| 0.0577475925375229 | 0.8124571581123852 | 0.5632518436056515 |
| 0.3697251589855949 | 0.9517961496304559 | 0.6861050408660482 |
| 0.8697251589856020 | 0.4517961496304629 | 0.6861050408660482 |
| 0.9682179951956762 | 0.2171449254848603 | 0.5833037966135592 |
| 0.4599692579064730 | 0.9304090492889371 | 0.3281802849324384 |
| 0.9599692579064730 | 0.4304090492889373 | 0.3281802849324384 |
| 0.4682179951956763 | 0.7171449254848604 | 0.5833037966135592 |
| 0.2193611289095702 | 0.5586595643459900 | 0.4601691075463029 |
| 0.2134011964617697 | 0.0911174480759769 | 0.4216006476694956 |
| 0.7134011964617700 | 0.5911174480759699 | 0.4216006476694956 |
| 0.7193611289095703 | 0.0586595643459899 | 0.4601691075463029 |
| 0.7452969211727367 | 0.5735795960104668 | 0.6668479393000794 |
| 0.1825260441747832 | 0.8249035604416677 | 0.4407489719499864 |
| 0.6825260441747972 | 0.3249035604416677 | 0.4407489719499864 |
| 0.2452969211727368 | 0.0735795960104668 | 0.6668479393000794 |
| 0.4629076550926099 | 0.1829749893261569 | 0.5479286501954356 |
| 0.9655272645636933 | 0.9705925897550166 | 0.3503764059616352 |
| 0.4655272645636933 | 0.4705925897550237 | 0.3503764059616352 |
| 0.9629076550926102 | 0.6829749893261498 | 0.5479286501954356 |
| 0.2193100812674732 | 0.8456208070942774 | 0.6565355911328576 |
| 0.2314540141486751 | 0.3029026133136766 | 0.6771607089445960 |
| 0.7314540141486752 | 0.8029026133136625 | 0.6771607089445960 |
| 0.7193100812674732 | 0.3456208070942847 | 0.6565355911328576 |
| 0.6782458658230517 | 0.8255794126190090 | 0.4428797529278882 |
| 0.2516637911520784 | 0.5764796956438837 | 0.6700539296556997 |
| 0.7516637911520783 | 0.0764796956438906 | 0.6700539296556997 |
| 0.1782458658230446 | 0.3255794126190090 | 0.4428797529278882 |

|                    |                    |                    |
|--------------------|--------------------|--------------------|
| 0.9607495810357845 | 0.1996548941339188 | 0.3383061922749663 |
| 0.4649597210201160 | 0.9510077479520501 | 0.5657591383142018 |
| 0.9666091270260179 | 0.6995699288742170 | 0.3374778360800877 |
| 0.4664404260882603 | 0.4478861639786720 | 0.5667755790775283 |
| 0.9664404260882601 | 0.9478861639786719 | 0.5667755790775283 |
| 0.4607495810357845 | 0.6996548941339189 | 0.3383061922749663 |
| 0.9649597210201158 | 0.4510077479520572 | 0.5657591383142018 |
| 0.4666091270260180 | 0.1995699288742170 | 0.3374778360800877 |



**Table S3** Optimized fractional coordinates of defective  $\text{In}_2\text{O}_3(110)$  surface.

O In

|                     |                     |                     |
|---------------------|---------------------|---------------------|
| 1.0000000000000000  |                     |                     |
| 10.2136999999999993 | 0.0000000000000000  | 0.0000000000000000  |
| 0.0000000000000009  | 14.4443000000000001 | 0.0000000000000000  |
| 0.0000000000000010  | 0.0000000000000010  | 15.9873999999999992 |

O In

47 32

Direct

|                    |                    |                    |
|--------------------|--------------------|--------------------|
| 0.6079304306729710 | 0.1825690215715158 | 0.4368002770924072 |
| 0.1077085674083970 | 0.6835891347653099 | 0.4371468220022620 |
| 0.1100480918313145 | 0.9633439022381499 | 0.4553092194490885 |
| 0.6077253005124805 | 0.4661751638983551 | 0.4553921428562343 |
| 0.3237124704458665 | 0.5840065164061800 | 0.3487404656572097 |
| 0.8241468588000934 | 0.0821072274832828 | 0.3453147846174471 |
| 0.8241227375003781 | 0.5649687914808678 | 0.5355691360838742 |
| 0.3268854739590573 | 0.0620937287386814 | 0.5357844922084158 |
| 0.0984780605025536 | 0.9713631139336384 | 0.6650067682517364 |
| 0.6004802351847963 | 0.4681976078818302 | 0.6674738275809342 |
| 0.3304425657164959 | 0.8190602812738225 | 0.3488488857939541 |
| 0.8269792518189398 | 0.3184267961972426 | 0.3458629052755592 |
| 0.5974900948387206 | 0.6873539464590392 | 0.6837149025575708 |
| 0.1033444385326377 | 0.1854841090061509 | 0.6838518813614721 |
| 0.8346515694965811 | 0.3292829040744734 | 0.5390688790005360 |
| 0.3341159384508046 | 0.8203128109655429 | 0.5460974891796149 |
| 0.5644195933562155 | 0.6958761821581845 | 0.4543376655933901 |
| 0.0598527968167493 | 0.1952141829568810 | 0.4606225176410749 |

|                    |                    |                    |
|--------------------|--------------------|--------------------|
| 0.3874214964378343 | 0.0670870879797024 | 0.3199669742895427 |
| 0.8884523512670672 | 0.5660829758312650 | 0.3195937585155770 |
| 0.8734078586249732 | 0.0854749803648107 | 0.5586596772107414 |
| 0.3714820135440350 | 0.5896106914100475 | 0.5662293537973380 |
| 0.0598778175509802 | 0.4588971357099526 | 0.4413756320873790 |
| 0.5594752245616545 | 0.9573426159928082 | 0.4411161338596047 |
| 0.7975955963560550 | 0.2155033927532374 | 0.6896138580944809 |
| 0.3112948481602416 | 0.4340634312167818 | 0.6764807594143428 |
| 0.8106182611231411 | 0.9373086741816931 | 0.6807203383760182 |
| 0.0965799062839993 | 0.3193089031172244 | 0.3144034443756113 |
| 0.5959681253277086 | 0.8214345714748595 | 0.3102518517591656 |
| 0.6123664047864682 | 0.8379121633542027 | 0.5717297093354891 |
| 0.1072337655653284 | 0.3379081612069428 | 0.5750318070410076 |
| 0.3324472462534441 | 0.4287908027453287 | 0.4612040273618646 |
| 0.8340787551045923 | 0.9276507090835280 | 0.4578727472570610 |
| 0.0916507471849532 | 0.0845702549981880 | 0.3115310722236380 |
| 0.5902304220608053 | 0.5835707030308743 | 0.3086238491082409 |
| 0.8309704378604588 | 0.7200353252756559 | 0.4348064170010208 |
| 0.3293881233756207 | 0.2200145002068597 | 0.4373622066178390 |
| 0.5963986355486008 | 0.0685731294441945 | 0.5845115122679980 |
| 0.0986509815324042 | 0.5709100272980906 | 0.5839517924289470 |
| 0.8699293695454243 | 0.6974976268767483 | 0.6695950515764795 |
| 0.3743549725308298 | 0.1956172678515657 | 0.6693640077880189 |
| 0.0315738792764035 | 0.8340621355862500 | 0.3221982291338083 |
| 0.5290401108347905 | 0.3346681723110753 | 0.3239527557737026 |
| 0.5572894227413215 | 0.3130876971873919 | 0.5637893317637325 |
| 0.0564702221374198 | 0.8124596368857852 | 0.5662283789511928 |

|                    |                    |                    |
|--------------------|--------------------|--------------------|
| 0.3686526544532605 | 0.9492010850853387 | 0.6864338558918153 |
| 0.8698344140413419 | 0.4521567319971163 | 0.6855585160410870 |
| 0.9675189864106216 | 0.2178452079166702 | 0.5830350654726754 |
| 0.4598586596943248 | 0.9312785992289118 | 0.3274643328884503 |
| 0.9601019777880750 | 0.4293166614818133 | 0.3287817416581935 |
| 0.4811463952202831 | 0.7139124370851010 | 0.5739090872649887 |
| 0.2196793630738668 | 0.5598246955379115 | 0.4641527010011173 |
| 0.2138724193119459 | 0.0908825637450463 | 0.4222246859180634 |
| 0.7168712740127819 | 0.5890757792855817 | 0.4185556299930151 |
| 0.7192480870643766 | 0.0588684797593408 | 0.4595714863703799 |
| 0.7442270052733285 | 0.5736010689004185 | 0.6664604300533979 |
| 0.1822014573664816 | 0.8239414870759709 | 0.4414419367547601 |
| 0.6810347471891793 | 0.3261640843475209 | 0.4415160209609933 |
| 0.2453771768528208 | 0.0749635582971302 | 0.6657460311966732 |
| 0.4644969882140590 | 0.1825067568865118 | 0.5479538388074916 |
| 0.9671235161326845 | 0.9706865201750098 | 0.3497222358375572 |
| 0.4641785311812667 | 0.4713181310009989 | 0.3522851694199939 |
| 0.9628603044959312 | 0.6815998838166549 | 0.5481411920090332 |
| 0.2140930781652488 | 0.8491110250649558 | 0.6574941179119635 |
| 0.2320455781729497 | 0.3021627899985138 | 0.6765504792171636 |
| 0.7302673527834967 | 0.8037806641437882 | 0.6765875731530203 |
| 0.7194551412829500 | 0.3467230316121135 | 0.6557044964604436 |
| 0.6820557090221204 | 0.8261878324325261 | 0.4382637803024193 |
| 0.2458806932649837 | 0.5791393267272685 | 0.6816772041096553 |
| 0.7514993533179353 | 0.0773223247024540 | 0.6698899674189539 |
| 0.1785237309962821 | 0.3259752960020086 | 0.4436088015334787 |
| 0.9607839461139976 | 0.1994263219471198 | 0.3391466434515312 |

|                    |                    |                    |
|--------------------|--------------------|--------------------|
| 0.4662088688332464 | 0.9489103517959434 | 0.5656198490101498 |
| 0.9688095605917886 | 0.6991472543110302 | 0.3369609086349577 |
| 0.4609572182108231 | 0.4480790719232645 | 0.5709655405364465 |
| 0.9644488321498866 | 0.9488861957917152 | 0.5658986214715223 |
| 0.4615970514296781 | 0.6991018305054362 | 0.3348068197688859 |
| 0.9664206796342327 | 0.4516153205498062 | 0.5657800972797521 |
| 0.4661977768321241 | 0.2001894360048248 | 0.3381434025873608 |

**Table S4** Optimized fractional coordinates of Zr1-In<sub>2</sub>O<sub>3</sub>(110) surface.

O In Zr In

|                    |                    |                    |  |
|--------------------|--------------------|--------------------|--|
| 1.000000000000000  |                    |                    |  |
| 10.213699999999993 | 0.000000000000000  | 0.000000000000000  |  |
| 0.000000000000009  | 14.444300000000001 | 0.000000000000000  |  |
| 0.000000000000010  | 0.000000000000010  | 15.987399999999992 |  |

|    |    |    |    |
|----|----|----|----|
| O  | In | Zr | In |
| 48 | 8  | 1  | 23 |

Direct

|                    |                    |                    |
|--------------------|--------------------|--------------------|
| 0.6081751382365200 | 0.1836668020697766 | 0.4373394366065556 |
| 0.1082280470806027 | 0.6830188910621765 | 0.4369151423874010 |
| 0.1080881261708425 | 0.9652439084825356 | 0.4544998070909977 |
| 0.6077204946199337 | 0.4657334709641098 | 0.4533294302570063 |
| 0.3225665016399233 | 0.5825513995963343 | 0.3446163458945188 |
| 0.8230516735635108 | 0.0820444223500023 | 0.3465618023662485 |
| 0.8158318674861913 | 0.5638700378264527 | 0.5418050551955425 |
| 0.3246953870536911 | 0.0646711749718297 | 0.5362389265323095 |
| 0.1012638505963335 | 0.9678554632957733 | 0.6669179910639184 |
| 0.6076251641681081 | 0.4741882567591653 | 0.6579690648975784 |
| 0.3282199555656653 | 0.8189270970937395 | 0.3444147342377131 |
| 0.8286008597498070 | 0.3182214128782598 | 0.3464132556388707 |
| 0.6100938955672673 | 0.6763109337991308 | 0.6788036514994874 |
| 0.1046943916869544 | 0.1851336770903588 | 0.6851962628530718 |
| 0.8353784353573821 | 0.3313668522461583 | 0.5415245203507024 |
| 0.3348925461873569 | 0.8288737979666682 | 0.5391957688329508 |
| 0.5589391196780891 | 0.6956075261617580 | 0.4598078147150156 |
| 0.0590645224776527 | 0.1967947653224527 | 0.4607495510438274 |

|                    |                    |                    |
|--------------------|--------------------|--------------------|
| 0.3885893878994097 | 0.0660203957851848 | 0.3207649736194471 |
| 0.8849917678350618 | 0.5661638187560231 | 0.3225799362114343 |
| 0.8743586955454971 | 0.0853105475711573 | 0.5604969823907774 |
| 0.3704405489689614 | 0.5848806132393782 | 0.5583547664729525 |
| 0.0570912446598973 | 0.4590913737895065 | 0.4428619948520192 |
| 0.5597638103084877 | 0.9572318027726373 | 0.4427445914653429 |
| 0.7976772978029185 | 0.2159349453233784 | 0.6906700139843019 |
| 0.3001605523539919 | 0.7152148718473338 | 0.6894646859274771 |
| 0.3141835597002695 | 0.4373195551950051 | 0.6804210213932387 |
| 0.8116894412806330 | 0.9365478818456442 | 0.6821822702653770 |
| 0.0970371550367970 | 0.3210257754536378 | 0.3138697397765333 |
| 0.5984927326904298 | 0.8198305278608885 | 0.3146811944265934 |
| 0.6061096905790786 | 0.8363468630370335 | 0.5777110337028800 |
| 0.1104819496020358 | 0.3380858945981394 | 0.5767839222012620 |
| 0.3312619085533887 | 0.4270652782562528 | 0.4578053965608655 |
| 0.8324645157930290 | 0.9262291190812177 | 0.4607944572845751 |
| 0.0900676947137505 | 0.0852291033473583 | 0.3109739274503345 |
| 0.5884904532197660 | 0.5854301330139655 | 0.3085478871396178 |
| 0.8303917839921514 | 0.7171191994290576 | 0.4394017040002641 |
| 0.3298625940956357 | 0.2200853448615069 | 0.4358258423619532 |
| 0.5968707416154463 | 0.0705470694284030 | 0.5843206800484261 |
| 0.0908191327151766 | 0.5705640408677323 | 0.5867600334244064 |
| 0.8710266649688277 | 0.6959762326227932 | 0.6687475688164292 |
| 0.3759106253288291 | 0.1975361863282616 | 0.6701198243186480 |
| 0.0293655304893394 | 0.8341272432524662 | 0.3236179920550251 |
| 0.5310230554284340 | 0.3344714923002514 | 0.3228085392081093 |
| 0.5563983016101108 | 0.3140066380040432 | 0.5645293829250274 |

|                    |                    |                    |
|--------------------|--------------------|--------------------|
| 0.0594177208507446 | 0.8137480993033617 | 0.5643241228804139 |
| 0.3710371064992727 | 0.9518255858291355 | 0.6865876872447175 |
| 0.8657588735910402 | 0.4558644907705776 | 0.6888652900892822 |
| 0.9695088335136360 | 0.2163180440658462 | 0.5842432762106328 |
| 0.4619128703267296 | 0.9301786474185190 | 0.3281007139295537 |
| 0.9597252048473386 | 0.4300990132961821 | 0.3280914101994045 |
| 0.4661952271089457 | 0.7161978438284099 | 0.5826272008861269 |
| 0.2186794735537982 | 0.5586699515932375 | 0.4584809581938857 |
| 0.2143800172788712 | 0.0906774137876923 | 0.4209407190629167 |
| 0.7111547624998757 | 0.5910499803953674 | 0.4186898969280803 |
| 0.7190991994568940 | 0.0585701533623428 | 0.4608733321768382 |
| 0.7540263652778508 | 0.5716617892398173 | 0.6615778886991834 |
| 0.1836643188998238 | 0.8262009250330223 | 0.4400870563689782 |
| 0.6816577575962136 | 0.3259520692991601 | 0.4397542308538714 |
| 0.2464421700326436 | 0.0737680341433121 | 0.6673404599073980 |
| 0.4625990054755051 | 0.1827597482225865 | 0.5472827783834283 |
| 0.9645331020967661 | 0.9706884905514167 | 0.3503614417809621 |
| 0.4639992751707245 | 0.4707271042782106 | 0.3478867933136154 |
| 0.9667555415726097 | 0.6856919682064442 | 0.5468624148439833 |
| 0.2207533910950263 | 0.8466704259310547 | 0.6569891120715314 |
| 0.2340720424361232 | 0.3023749321932661 | 0.6783423854204201 |
| 0.7305688441935074 | 0.8034157883667202 | 0.6777123252519012 |
| 0.7159637547638780 | 0.3435815951434624 | 0.6550339588562482 |
| 0.6785907206960718 | 0.8248097120749667 | 0.4439089969846653 |
| 0.2502354522345033 | 0.5768066364833474 | 0.6705395028128075 |
| 0.7504757454572119 | 0.0763757883823033 | 0.6711852086650646 |
| 0.1784552773122194 | 0.3247530586234607 | 0.4422522001667673 |

|                    |                    |                    |
|--------------------|--------------------|--------------------|
| 0.9606031490838437 | 0.1992446777223590 | 0.3384443254648393 |
| 0.4646447733381387 | 0.9510804523968324 | 0.5657792576529838 |
| 0.9660874603119951 | 0.6996204166978089 | 0.3373513846698640 |
| 0.4619344669524018 | 0.4480875770086936 | 0.5649444948680042 |
| 0.9673063835560426 | 0.9489126746184676 | 0.5671415219728689 |
| 0.4599667130984318 | 0.7000963974065889 | 0.3371231094935748 |
| 0.9691603861089049 | 0.4483552062513810 | 0.5667803938376730 |
| 0.4676238000392227 | 0.1994134702697347 | 0.3368152261104792 |



**Table S5** Optimized fractional coordinates of defective Zr1-In<sub>2</sub>O<sub>3</sub>(110) surface.

O In Zr In

|                     |                     |                    |  |
|---------------------|---------------------|--------------------|--|
| 1.0000000000000000  |                     |                    |  |
| 10.2136999999999993 | 0.0000000000000000  | 0.0000000000000000 |  |
| 0.0000000000000009  | 14.4443000000000001 | 0.0000000000000000 |  |
| 0.0000000000000010  | 0.0000000000000010  | 15.987399999999992 |  |

|    |    |    |    |
|----|----|----|----|
| O  | In | Zr | In |
| 47 | 11 | 1  | 20 |

Direct

|                    |                    |                    |
|--------------------|--------------------|--------------------|
| 0.6085413404815252 | 0.1835291752756111 | 0.4373118694140167 |
| 0.1081015213609581 | 0.6838297450136619 | 0.4374488862271114 |
| 0.1096916136801709 | 0.9647130747628530 | 0.4529545394222271 |
| 0.6070687948659901 | 0.4672635083178537 | 0.4555776918846583 |
| 0.3231967946500799 | 0.5832546241073059 | 0.3495005066065773 |
| 0.8227676688918406 | 0.0824283818464371 | 0.3440114044746452 |
| 0.8236518527915861 | 0.5653386630702877 | 0.5355948941189144 |
| 0.3178934230782695 | 0.0618362402403157 | 0.5405828143313167 |
| 0.1073620491708970 | 0.9756404999280534 | 0.6558901394679668 |
| 0.6010578771433425 | 0.4690556935238095 | 0.6685408660594858 |
| 0.3307036632302112 | 0.8182323265242523 | 0.3505300625640442 |
| 0.8279003536962783 | 0.3193031449729125 | 0.3451491456834082 |
| 0.5984520122429623 | 0.6881227456299478 | 0.6840727917262133 |
| 0.1108856775031225 | 0.1764079211472495 | 0.6785740030244075 |
| 0.8345680765749093 | 0.3297133887629016 | 0.5390943191725041 |
| 0.3356271702568655 | 0.8234935439282532 | 0.5495533982152158 |
| 0.5641315291030410 | 0.6962256720419906 | 0.4543491478718840 |
| 0.0589771522728553 | 0.1948048128286315 | 0.4600226997653858 |

|                    |                    |                    |
|--------------------|--------------------|--------------------|
| 0.3848789493468351 | 0.0670826540730108 | 0.3226343243611118 |
| 0.8902745880565278 | 0.5658391824001550 | 0.3197515200966398 |
| 0.8700501444707807 | 0.0846249437751347 | 0.5579454072714859 |
| 0.3705044933026446 | 0.5906221634265072 | 0.5675463392589749 |
| 0.0601922852260282 | 0.4577860298140982 | 0.4426653336868792 |
| 0.5565591540965040 | 0.9578761116795643 | 0.4422566123083752 |
| 0.7996193255366733 | 0.2153447105377388 | 0.6886686413464760 |
| 0.3102187887517601 | 0.4342114927126203 | 0.6779525709601085 |
| 0.8132571181838667 | 0.9374880077125834 | 0.6803749435562361 |
| 0.0989706544075131 | 0.3192606498972024 | 0.3154091439988300 |
| 0.5957361819404543 | 0.8219697293434263 | 0.3099731826191230 |
| 0.6151693852629037 | 0.8376787551574219 | 0.5720003025629056 |
| 0.1045736194456830 | 0.3355743357592576 | 0.5773307140386413 |
| 0.3319623546603336 | 0.4282931620917264 | 0.4634802661127205 |
| 0.8330511407774139 | 0.9276571610897082 | 0.4558354373606121 |
| 0.0891927525747463 | 0.0854721709877795 | 0.3087234390073254 |
| 0.5894342571680470 | 0.5837116940273199 | 0.3082882021742115 |
| 0.8311230119984314 | 0.7197064888139849 | 0.4335804138263287 |
| 0.3303265663285877 | 0.2176630993019835 | 0.4404136516721081 |
| 0.5913631157838058 | 0.0689417412592727 | 0.5856904840592462 |
| 0.0976656795001817 | 0.5710677253748734 | 0.5840922102682443 |
| 0.8712628782762221 | 0.6974122805463885 | 0.6695903547069442 |
| 0.3718474726034157 | 0.1941551878566274 | 0.6678853058751235 |
| 0.0326151041907458 | 0.8341925600678227 | 0.3213824303716051 |
| 0.5284117598441396 | 0.3351953101469455 | 0.3252608184154724 |
| 0.5584583636543500 | 0.3150016596572264 | 0.5650118626644897 |
| 0.0552830338990327 | 0.8136627185664264 | 0.5645325482546041 |

|                    |                    |                    |
|--------------------|--------------------|--------------------|
| 0.3685133878993194 | 0.9565705254397151 | 0.6897476972888034 |
| 0.8703075545407496 | 0.4525801090615665 | 0.6862327085510468 |
| 0.9660132038787158 | 0.2161729813266663 | 0.5827721078126703 |
| 0.4587328971497971 | 0.9309401628577509 | 0.3274849617178777 |
| 0.9626428544636445 | 0.4295273367306988 | 0.3285222512527472 |
| 0.4820989263354945 | 0.7141890877075950 | 0.5742354998644618 |
| 0.2190648426031808 | 0.5597095748379360 | 0.4647579051177239 |
| 0.2116651587615292 | 0.0911601039943152 | 0.4191881013573772 |
| 0.7175100574604383 | 0.5890652023491801 | 0.4175081006670481 |
| 0.7183602508374527 | 0.0586378602843423 | 0.4579444381737412 |
| 0.7448540139520311 | 0.5742160817824260 | 0.6667501773355483 |
| 0.1820227771017848 | 0.8248607613088510 | 0.4423434744819795 |
| 0.6822956445482992 | 0.3278620911130383 | 0.4409842952382097 |
| 0.2542690845857022 | 0.0702188739735560 | 0.6607520033446174 |
| 0.4680466473962889 | 0.1855470497783566 | 0.5473693690253157 |
| 0.9659251311741417 | 0.9706262593123092 | 0.3470906198337312 |
| 0.4632799529731437 | 0.4714197002853512 | 0.3525889680715016 |
| 0.9619011349325256 | 0.6822111087166793 | 0.5471690536665696 |
| 0.2111590394238863 | 0.8399325338143065 | 0.6634028046823616 |
| 0.2312172021249671 | 0.3019989779316941 | 0.6770997670321536 |
| 0.7323481250473147 | 0.8036918530989415 | 0.6773380670970934 |
| 0.7206668908380882 | 0.3474756411594672 | 0.6564052547486252 |
| 0.6821982440941212 | 0.8257965594604926 | 0.4371350463411143 |
| 0.2432030646211824 | 0.5800342034725153 | 0.6821887958072648 |
| 0.7496276835345775 | 0.0770262911648248 | 0.6699832887887189 |
| 0.1785560985318786 | 0.3252838903138182 | 0.4449488016783190 |
| 0.9596783462192544 | 0.1999470331813505 | 0.3378634198647517 |

|                    |                    |                    |
|--------------------|--------------------|--------------------|
| 0.4686598372885507 | 0.9462438283510590 | 0.5671041159115667 |
| 0.9704438943989956 | 0.6992049933432581 | 0.3360146209041805 |
| 0.4612383013936233 | 0.4495536102407344 | 0.5722444619494855 |
| 0.9626992935376795 | 0.9484638778164488 | 0.5640305234614000 |
| 0.4611276742600350 | 0.6987881991927856 | 0.3346649162307175 |
| 0.9655721916384289 | 0.4516649537094151 | 0.5660742461515623 |
| 0.4658498421706384 | 0.2004637948894252 | 0.3381544956849271 |

**Table S6** Optimized fractional coordinates of Zr<sub>3</sub>-In<sub>2</sub>O<sub>3</sub>(110) surface.

O In Zr

1.0000000000000000

10.2137000000000011 0.0000000000000000 0.0000000000000000

0.0000000000000000 14.4442999999999984 0.0000000000000000

0.0000000000000000 0.0000000000000000 15.9874000000000045

O In Zr

48 31 1

Selective dynamics

Direct

0.6085130314376889 0.1815443042852970 0.4344215233695581

0.1095143572599503 0.6801554332332203 0.4389540452042276

0.1119235571755236 0.9643886264863795 0.4564536782964743

0.6155919725189041 0.4640478358177008 0.4455278421855437

0.3279391756557578 0.5815266610985488 0.3404890466870635

0.8272659884805668 0.0824036132089090 0.3471668387998894

0.8249026967663836 0.5645214721752039 0.5335176343698722

0.3266626692944860 0.0641560562622397 0.5373086503803838

0.1022464665259393 0.9669766894246630 0.6676045522294183

0.5902197168558052 0.4684138340796453 0.6613693956702296

0.3317147838544213 0.8167263021585905 0.3498967625399347

0.8332631413374636 0.3176972531204796 0.3422910345900488

0.5940872711568971 0.6854980789313910 0.6822276410128030

0.1032642775098447 0.1853117741355407 0.6863957307721228

0.8363713657521338 0.3274954523394515 0.5380420445664392

0.3358272334036523 0.8217743851129402 0.5458113662323282

|                    |                    |                    |
|--------------------|--------------------|--------------------|
| 0.5630490200449794 | 0.6909331879879580 | 0.4555609080154211 |
| 0.0619786408376100 | 0.1961720955697507 | 0.4622923314380978 |
| 0.3862311514793551 | 0.0656460740582615 | 0.3206684394190016 |
| 0.8943132887023599 | 0.5656498720209124 | 0.3190699664356795 |
| 0.8755316353484911 | 0.0845791705015433 | 0.5609122343198700 |
| 0.3663389950073165 | 0.5841253770304649 | 0.5674704266363475 |
| 0.0614325481013441 | 0.4590074261737580 | 0.4434150079709449 |
| 0.5598150685728369 | 0.9572842005775563 | 0.4418814338074541 |
| 0.7959402055824101 | 0.2161872929261814 | 0.6898258973553725 |
| 0.2497860471290857 | 0.7071788074219785 | 0.7049625598968342 |
| 0.2615868914481031 | 0.4462749940091072 | 0.7119542511633911 |
| 0.8100199508932936 | 0.9368796060965072 | 0.6821625478462917 |
| 0.1040242789167669 | 0.3203266152764432 | 0.3163795569863326 |
| 0.5982144221208789 | 0.8209915591877934 | 0.3116920055985617 |
| 0.6129597280020027 | 0.8375505220127464 | 0.5715758959331746 |
| 0.1119760236557366 | 0.3408590548460155 | 0.5778018440852174 |
| 0.3363269413188474 | 0.4306437466970712 | 0.4572538643415164 |
| 0.8354497278669554 | 0.9272388387996880 | 0.4593841274881746 |
| 0.0941857942040875 | 0.0848166216679789 | 0.3119817395054509 |
| 0.5946728432161461 | 0.5858263952520918 | 0.3042713898514371 |
| 0.8321795466117835 | 0.7203082603242468 | 0.4321827491089324 |
| 0.3322007999394878 | 0.2208547352948300 | 0.4366276089050263 |
| 0.5968468229303877 | 0.0708961598759511 | 0.5841139956556352 |
| 0.0921206047812925 | 0.5709216216378776 | 0.5927883770092166 |
| 0.8656933847454715 | 0.6970357548770071 | 0.6678691188063545 |
| 0.3719221684174530 | 0.2026405587632320 | 0.6688862302344231 |

|                    |                    |                    |
|--------------------|--------------------|--------------------|
| 0.0376205680111080 | 0.8344958189737779 | 0.3246958891547423 |
| 0.5322200573268997 | 0.3329781016787788 | 0.3190263573199568 |
| 0.5602490307754066 | 0.3133862851282717 | 0.5585930862682085 |
| 0.0579564378105647 | 0.8118419451256643 | 0.5638476569575397 |
| 0.3709045076351969 | 0.9508625562570322 | 0.6864850745283870 |
| 0.8600077143323372 | 0.4521190306782269 | 0.6839352485824584 |
| 0.9697051222020970 | 0.2166761488712719 | 0.5848829498652591 |
| 0.4598843548470384 | 0.9302976803045271 | 0.3281745553987234 |
| 0.9664480402173528 | 0.4290643562925834 | 0.3270261053467875 |
| 0.4781355932474225 | 0.7161116751241484 | 0.5743282272168908 |
| 0.2206798907928754 | 0.5576580866098821 | 0.4524501433232762 |
| 0.2164065371460923 | 0.0905187784511605 | 0.4225369305956197 |
| 0.7220706754042645 | 0.5900222087169115 | 0.4138272727937961 |
| 0.7207659259188004 | 0.0585094705042923 | 0.4606594359632958 |
| 0.7394537994494712 | 0.5740619682546572 | 0.6641596882200423 |
| 0.1838765489762455 | 0.8242677484443933 | 0.4436036290132196 |
| 0.6875668784643812 | 0.3213504594429619 | 0.4363352413397970 |
| 0.2460787731370676 | 0.0747007224677743 | 0.6672641548243037 |
| 0.4628685950406741 | 0.1836639445091167 | 0.5475623127470612 |
| 0.9689663728093876 | 0.9707551677353411 | 0.3515175656958836 |
| 0.4710052266992912 | 0.4703028937176538 | 0.3401518439521998 |
| 0.9592546779572575 | 0.6841821348638442 | 0.5469038141249108 |
| 0.2184340519268341 | 0.8439453111824894 | 0.6618525256595388 |
| 0.2274258304834198 | 0.3063838304583524 | 0.6844626770172473 |
| 0.7278270326016931 | 0.8041583390000656 | 0.6778187699694033 |
| 0.7150783428299098 | 0.3448017709824209 | 0.6542252787985126 |

|                    |                    |                    |
|--------------------|--------------------|--------------------|
| 0.6827567813922883 | 0.8263481135718588 | 0.4392327937547746 |
| 0.7507224952686364 | 0.0769179673835196 | 0.6711849091277839 |
| 0.1810216265964975 | 0.3246577486087689 | 0.4459679197302455 |
| 0.9654066436283761 | 0.1987765543722154 | 0.3389605469957896 |
| 0.4662697594386452 | 0.9501646832345721 | 0.5663426818967862 |
| 0.9732017634823149 | 0.7000041540672405 | 0.3348802549428618 |
| 0.4817086764033626 | 0.4515223189906039 | 0.5518081633068110 |
| 0.9675832195674662 | 0.9479176986588582 | 0.5681372147801333 |
| 0.4649769472457950 | 0.6997509008643177 | 0.3333521841821521 |
| 0.9622260712634179 | 0.4496199405146807 | 0.5653916074088577 |
| 0.4663176062012516 | 0.1987759426121594 | 0.3355498088602615 |
| 0.2418435886089796 | 0.5762612225884310 | 0.6696431856159880 |



**Table S7** Optimized fractional coordinates of defective Zr<sub>3</sub>-In<sub>2</sub>O<sub>3</sub>(110) surface.

O In Zr In

|                     |                     |                     |  |
|---------------------|---------------------|---------------------|--|
| 1.0000000000000000  |                     |                     |  |
| 10.2136999999999993 | 0.0000000000000000  | 0.0000000000000000  |  |
| 0.0000000000000009  | 14.4443000000000001 | 0.0000000000000000  |  |
| 0.0000000000000010  | 0.0000000000000010  | 15.9873999999999992 |  |

|    |    |    |    |
|----|----|----|----|
| O  | In | Zr | In |
| 47 | 21 | 1  | 10 |

Direct

|                    |                    |                    |
|--------------------|--------------------|--------------------|
| 0.6102792875503488 | 0.1828108140755455 | 0.4324927636177608 |
| 0.1102857668385805 | 0.6788293338708421 | 0.4408454507468572 |
| 0.1137754987081554 | 0.9670349854859359 | 0.4552970892233930 |
| 0.6186454213003293 | 0.4652484581486443 | 0.4429016959682970 |
| 0.3303122283321767 | 0.5819112905228656 | 0.3339413079529121 |
| 0.8294638308953903 | 0.0844925967984694 | 0.3463413595832950 |
| 0.8264516637941385 | 0.5663639319189864 | 0.5335939582480402 |
| 0.3282186130365721 | 0.0666812189409105 | 0.5353574220113940 |
| 0.1085400186879968 | 0.9652963055030435 | 0.6657739875885675 |
| 0.5862947016473827 | 0.4707565205333885 | 0.6592108712645774 |
| 0.3313154774295533 | 0.8166479730884076 | 0.3498972259814408 |
| 0.8363489709200255 | 0.3198285113368546 | 0.3409520691621034 |
| 0.5864940130443901 | 0.6874729771060729 | 0.6818106685950183 |
| 0.1047344109736850 | 0.1846583369743045 | 0.6833997477927871 |
| 0.8372889158559287 | 0.3287911008419737 | 0.5373391154933436 |
| 0.3357706243827671 | 0.8252314930501594 | 0.5450659937061385 |
| 0.5615722752397232 | 0.6897575024741470 | 0.4546535034832774 |

|                    |                    |                    |
|--------------------|--------------------|--------------------|
| 0.0632169852729394 | 0.1989285636274321 | 0.4613880414579888 |
| 0.3865847076658767 | 0.0668111045402705 | 0.3195868363891392 |
| 0.8964018230209144 | 0.5678557264639124 | 0.3187936670914810 |
| 0.8773136228250256 | 0.0844527607827043 | 0.5605980997005545 |
| 0.3577134884254677 | 0.5855381255975967 | 0.5685298972201093 |
| 0.0629677526157365 | 0.4625283155343898 | 0.4456174842214736 |
| 0.5605770658123138 | 0.9585508780801353 | 0.4404424010837619 |
| 0.7953268067130039 | 0.2166927670716846 | 0.6884020475881404 |
| 0.2641654629981289 | 0.4466468654567899 | 0.7088906918325507 |
| 0.8094152859882786 | 0.9380016815566019 | 0.6843758309584640 |
| 0.1071177196342807 | 0.3242353244145054 | 0.3165132495424409 |
| 0.5983235508103331 | 0.8221805041850435 | 0.3107723994647615 |
| 0.6148256711589783 | 0.8387428596305995 | 0.5693499590283572 |
| 0.1129381876481068 | 0.3438665165849787 | 0.5777304347544402 |
| 0.3391107588830957 | 0.4332022351727083 | 0.4541435971828508 |
| 0.8371588822939020 | 0.9289586420692544 | 0.4582115249671189 |
| 0.0958549566801880 | 0.0873551683985676 | 0.3104594851846384 |
| 0.5978314503148076 | 0.5880617553962001 | 0.3020650517430418 |
| 0.8314026683743954 | 0.7214926798675513 | 0.4311909952010177 |
| 0.3340366897613053 | 0.2234534999309701 | 0.4350088055536435 |
| 0.5991526419838534 | 0.0722943600080969 | 0.5813704309116324 |
| 0.0868725375966308 | 0.5732930617453954 | 0.6086398300130157 |
| 0.8596292033296091 | 0.6986361750843829 | 0.6685207362425093 |
| 0.3759180684686587 | 0.2037774123283896 | 0.6677690572301918 |
| 0.0401319678888785 | 0.8359539080799819 | 0.3254516400352113 |
| 0.5356817924663496 | 0.3338705386526457 | 0.3168716394426170 |

|                    |                    |                    |
|--------------------|--------------------|--------------------|
| 0.5611764396865068 | 0.3148869543436670 | 0.5567099702912621 |
| 0.0550344296582835 | 0.8119730868923868 | 0.5603150323220674 |
| 0.3788920272842192 | 0.9559813865168387 | 0.6866624265500005 |
| 0.8552447534986951 | 0.4529097989821001 | 0.6839125993066743 |
| 0.9690000930394228 | 0.2168308897446474 | 0.5834537931310448 |
| 0.4582276311509602 | 0.9308850793923281 | 0.3280154821431697 |
| 0.9687488025304485 | 0.4318877125775888 | 0.3274208688787477 |
| 0.4766962701020734 | 0.7203331723423415 | 0.5715688675215919 |
| 0.2245534697063770 | 0.5589162742887867 | 0.4453952234766020 |
| 0.2180836671159213 | 0.0926020199270169 | 0.4211059031619139 |
| 0.7236123225005233 | 0.5917760521306379 | 0.4123458629158186 |
| 0.7224890864464159 | 0.0593295406060713 | 0.4595010541083036 |
| 0.7356892902832659 | 0.5760605302057927 | 0.6634920953484106 |
| 0.1846225172414332 | 0.8257467585197791 | 0.4458527294733424 |
| 0.6898339091605179 | 0.3219887799254922 | 0.4342341603337083 |
| 0.2488709102294420 | 0.0733559953482530 | 0.6660851968277413 |
| 0.4650849160700875 | 0.1844206782574310 | 0.5454614942894037 |
| 0.9710819018665774 | 0.9726834184053811 | 0.3512128242938467 |
| 0.4757630549762478 | 0.4715256363389501 | 0.3352819963602100 |
| 0.9564597843700438 | 0.6866512497419642 | 0.5475637703897024 |
| 0.2260036273334101 | 0.8382572288627772 | 0.6751643730430331 |
| 0.2292404376181883 | 0.3032028948845453 | 0.6803668464812915 |
| 0.7237020187536035 | 0.8069048108474208 | 0.6779996368335519 |
| 0.7133109111721579 | 0.3451398053053460 | 0.6530645332101033 |
| 0.6843123100026748 | 0.8286368534586243 | 0.4377274394810968 |
| 0.2447418027059652 | 0.5711716422092527 | 0.6706754335605417 |

|                    |                    |                    |
|--------------------|--------------------|--------------------|
| 0.7505427106477487 | 0.0769955913550260 | 0.6701039084066386 |
| 0.1825853706116787 | 0.3266531460022215 | 0.4454928795783199 |
| 0.9675035371674896 | 0.2008428641579960 | 0.3374979402890843 |
| 0.4657720510748363 | 0.9517353778897717 | 0.5651245493069196 |
| 0.9754729560347429 | 0.7020079252057457 | 0.3354414295870796 |
| 0.4843795155877098 | 0.4530418209600667 | 0.5476921958059868 |
| 0.9726890912079339 | 0.9485590975867756 | 0.5679879223931432 |
| 0.4666114350248388 | 0.7013895302499833 | 0.3312414210195345 |
| 0.9609424394390974 | 0.4511007524793295 | 0.5664206967064574 |
| 0.4677830414322406 | 0.1998608631262915 | 0.3336893787133073 |

**Table S8** Optimized fractional coordinates of In-CO<sub>2</sub> adsorption on In<sub>2</sub>O<sub>3</sub>(110) surface.

O In C O

|                     |                     |                     |
|---------------------|---------------------|---------------------|
| 1.0000000000000000  |                     |                     |
| 10.2136999999999993 | 0.0000000000000000  | 0.0000000000000000  |
| 0.0000000000000009  | 14.4443000000000001 | 0.0000000000000000  |
| 0.0000000000000010  | 0.0000000000000010  | 15.9873999999999992 |

O In C O

|    |    |   |   |
|----|----|---|---|
| 47 | 32 | 1 | 2 |
|----|----|---|---|

Direct

|                    |                    |                    |
|--------------------|--------------------|--------------------|
| 0.6091114443259160 | 0.1819407289191223 | 0.4347767875663932 |
| 0.1085877025047812 | 0.6831818639680752 | 0.4362595744337136 |
| 0.1110681091181432 | 0.9618052188377647 | 0.4536389384306919 |
| 0.6091514620516423 | 0.4651408833231080 | 0.4538553940510164 |
| 0.3243626793625463 | 0.5833098806828271 | 0.3482403941823417 |
| 0.8256408545526470 | 0.0810263747706245 | 0.3433820008608834 |
| 0.8246430097337227 | 0.5643715006844877 | 0.5343400835480985 |
| 0.3281702061716577 | 0.0608036312404446 | 0.5337005626676591 |
| 0.0981715041114084 | 0.9731494428607915 | 0.6624217290682465 |
| 0.6019455820117058 | 0.4673161426789660 | 0.6665643960616996 |
| 0.3321255062819687 | 0.8183872391272410 | 0.3471219192060441 |
| 0.8287552154360139 | 0.3174898269449552 | 0.3447730506003815 |
| 0.5982155391501333 | 0.6870883782208276 | 0.6832912879675839 |
| 0.1041109179701078 | 0.1846635190478692 | 0.6830028735475125 |
| 0.8358677274004558 | 0.3282823237529244 | 0.5380290389650747 |
| 0.3349840769628837 | 0.8186170962744358 | 0.5447330111166915 |
| 0.5652990729592831 | 0.6948546490255910 | 0.4529635229933198 |

|                    |                    |                    |
|--------------------|--------------------|--------------------|
| 0.0611970811725124 | 0.1938433492410503 | 0.4591919098605129 |
| 0.3893210218363938 | 0.0662373307043450 | 0.3176404590939974 |
| 0.8899990477257537 | 0.5650916426435466 | 0.3178109578359229 |
| 0.8735241301881506 | 0.0851149484287720 | 0.5568897647319547 |
| 0.3725674552169016 | 0.5879030362180034 | 0.5657828802655240 |
| 0.0611613238414867 | 0.4579646930762906 | 0.4401208862747358 |
| 0.5608742267441693 | 0.9563001105195108 | 0.4391189035723158 |
| 0.7984175291183008 | 0.2146584054105552 | 0.6888923998676659 |
| 0.3144717885539560 | 0.4307171523197880 | 0.6754796094182340 |
| 0.8108893808620401 | 0.9369191180998170 | 0.6792898559493502 |
| 0.0982119741337721 | 0.3182244375642203 | 0.3130185202079860 |
| 0.5973218818769125 | 0.8203114048047834 | 0.3083479660931339 |
| 0.6132016740148423 | 0.8366647498436850 | 0.5699810650396789 |
| 0.1082248785572829 | 0.3367366941623813 | 0.5736855086916492 |
| 0.3336130802279950 | 0.4275734270838780 | 0.4602021436313681 |
| 0.8349744193310291 | 0.9267102420156291 | 0.4560142388556500 |
| 0.0930141546278334 | 0.0833006274024142 | 0.3098917040451959 |
| 0.5906762363984747 | 0.5824987494785705 | 0.3072132423048250 |
| 0.8320803597079062 | 0.7190500347541580 | 0.4331163490962143 |
| 0.3305851595932446 | 0.2188172282454499 | 0.4354644969236371 |
| 0.5973828675443191 | 0.0678146640616173 | 0.5823794034716518 |
| 0.0997709651127246 | 0.5696683747453686 | 0.5826389287857915 |
| 0.8707882803547318 | 0.6968553345881235 | 0.6685349269606528 |
| 0.3758752356671169 | 0.1942799854683635 | 0.6674328307764660 |
| 0.0329390910516833 | 0.8329278995121863 | 0.3198307616622234 |
| 0.5298221938713042 | 0.3340547502096443 | 0.3219103087441960 |

|                    |                    |                    |
|--------------------|--------------------|--------------------|
| 0.5590428816950669 | 0.3120562384236426 | 0.5623662672471105 |
| 0.0566883271014262 | 0.8119716822704311 | 0.5660314171797274 |
| 0.3694987658065150 | 0.9485397949333959 | 0.6842160914349867 |
| 0.8712079669868571 | 0.4514967281335605 | 0.6843710107506262 |
| 0.9687803298845947 | 0.2169481336668846 | 0.5816628832348387 |
| 0.4617547166408452 | 0.9305123155107566 | 0.3251918004168634 |
| 0.9619590385561703 | 0.4284053836832873 | 0.3274665948930804 |
| 0.4823406863059452 | 0.7119660625599910 | 0.5728339254139926 |
| 0.2209729761121870 | 0.5590372460460208 | 0.4639004781523290 |
| 0.2151593391115958 | 0.0896341637480664 | 0.4204232181560513 |
| 0.7179509084030000 | 0.5879898163746753 | 0.4168201335694414 |
| 0.7201924270694527 | 0.0582608308983665 | 0.4574564217114128 |
| 0.7453207113258802 | 0.5728551874573946 | 0.6655948579454093 |
| 0.1836367034921026 | 0.8229120307003827 | 0.4392641598526016 |
| 0.6826124231924440 | 0.3253799255322081 | 0.4402172656713064 |
| 0.2469883003461766 | 0.0749891454800454 | 0.6638727127891304 |
| 0.4655791941065779 | 0.1818501004824511 | 0.5458610009596929 |
| 0.9682864021475965 | 0.9694136674292383 | 0.3476874808636126 |
| 0.4645455542480390 | 0.4702879742689406 | 0.3513045498361408 |
| 0.9640141361188287 | 0.6804302162225808 | 0.5471228025191255 |
| 0.2138766193198444 | 0.8525632581224752 | 0.6531866404756708 |
| 0.2327885035676418 | 0.3005870962640001 | 0.6755114476079936 |
| 0.7310607280005683 | 0.8032575806074539 | 0.6751176397359353 |
| 0.7207872899083589 | 0.3458835940345906 | 0.6547697744326318 |
| 0.6830261587417481 | 0.8249435772410244 | 0.4363725225012449 |
| 0.2463599900497857 | 0.5746947123437270 | 0.6826908145407615 |

|                    |                    |                    |
|--------------------|--------------------|--------------------|
| 0.7517109390430963 | 0.0769478665347768 | 0.6682644049053978 |
| 0.1797489882328341 | 0.3249394869084207 | 0.4423909823569289 |
| 0.9623434204161682 | 0.1984625160925931 | 0.3375528484194483 |
| 0.4681778947284619 | 0.9480665837140593 | 0.5635885990577109 |
| 0.9701890422563549 | 0.6980411519878069 | 0.3354671996560702 |
| 0.4621241008161769 | 0.4467095072920472 | 0.5701767511689795 |
| 0.9639718055051189 | 0.9485993073963808 | 0.5639487885432785 |
| 0.4624517362234599 | 0.6980218500281273 | 0.3334066201430402 |
| 0.9673570076633966 | 0.4507365102122336 | 0.5644718757678064 |
| 0.4673239772735145 | 0.1996239312668567 | 0.3359659934266793 |
| 0.2291695743188936 | 0.7448513721766374 | 0.8651045959577228 |
| 0.1927302433915626 | 0.8080934979580792 | 0.8246996227836477 |
| 0.2652441444558701 | 0.6823228650342065 | 0.9054632184937319 |



**Table S9** Optimized fractional coordinates of In-CO<sub>2</sub> adsorption on Zr1-In<sub>2</sub>O<sub>3</sub>(110) surface.

O In Zr In C O

1.0000000000000000  
 10.2136999999999993 0.0000000000000000 0.0000000000000000  
 0.0000000000000009 14.4443000000000001 0.0000000000000000  
 0.0000000000000010 0.0000000000000010 15.9873999999999992

O In Zr In C O

47 11 1 20 1 2

Direct

0.6098481282871878 0.1825639202036043 0.4353633945893160  
 0.1091149015861139 0.6827906400327025 0.4354456878660807  
 0.1108636309613575 0.9634629680302975 0.4503234713472434  
 0.6082856149411022 0.4661367140316200 0.4543651706804296  
 0.3241154691544046 0.5823493950044010 0.3480967782058311  
 0.8240947777220723 0.0813785540976957 0.3408408976242883  
 0.8248664540100206 0.5641987075746649 0.5338857202541928  
 0.3187384381862934 0.0606951738774364 0.5388281251801017  
 0.1077545915437765 0.9750492062116910 0.6532077833840479  
 0.6025803085992748 0.4678471055833490 0.6671999030771789  
 0.3318261473450249 0.8169449737274919 0.3477554223141982  
 0.8292787034068273 0.3182683894258168 0.3432274866256341  
 0.6006572097119984 0.6873290876714573 0.6825791121571686  
 0.1121264268012767 0.1749346656521526 0.6760746755825666  
 0.8357578931636642 0.3287159621871335 0.5368834498115692  
 0.3372356424492872 0.8219649663616405 0.5464815675473287

|                    |                    |                    |
|--------------------|--------------------|--------------------|
| 0.5655625731342240 | 0.6949658196308419 | 0.4525153183083165 |
| 0.0603699289686399 | 0.1937870595390328 | 0.4574205708169002 |
| 0.3861197603424899 | 0.0659192265077426 | 0.3208284772132967 |
| 0.8909011977496423 | 0.5646431952491592 | 0.3177320486929213 |
| 0.8707250740267337 | 0.0838786120497466 | 0.5547547509528078 |
| 0.3722576472463139 | 0.5894936949052867 | 0.5659971323957049 |
| 0.0616241619388453 | 0.4565501447295777 | 0.4406063623328989 |
| 0.5582559632731345 | 0.9566960408445506 | 0.4398308481050220 |
| 0.8017989941835780 | 0.2143130810977970 | 0.6862880037171846 |
| 0.3109992057766220 | 0.4331440615194835 | 0.6759790029467384 |
| 0.8158454956409459 | 0.9364086634161958 | 0.6774709472809732 |
| 0.1005510415406680 | 0.3183124876328893 | 0.3130457289688475 |
| 0.5968445683381056 | 0.8205201944374835 | 0.3079371722888429 |
| 0.6170641929281119 | 0.8363996222781991 | 0.5697849318428303 |
| 0.1058402116100355 | 0.3343499413278499 | 0.5750547165807639 |
| 0.3332765940888620 | 0.4271463691851073 | 0.4618515162398248 |
| 0.8343663062856010 | 0.9267102837279678 | 0.4527664903532596 |
| 0.0908018319267907 | 0.0845208339348871 | 0.3062973528777840 |
| 0.5904746044856768 | 0.5824018019077183 | 0.3067493555109285 |
| 0.8325812328348001 | 0.7186689808168287 | 0.4318151744821469 |
| 0.3318917461156405 | 0.2166822495646824 | 0.4385498533728809 |
| 0.5922550835998152 | 0.0674963161690076 | 0.5838438472218567 |
| 0.0991965553303710 | 0.5697089943083848 | 0.5819749177889992 |
| 0.8738256833038029 | 0.6961336991746812 | 0.6679403629980497 |
| 0.3727800784777228 | 0.1926788571387640 | 0.6662759566627717 |
| 0.0338784316696032 | 0.8329873468946113 | 0.3188805822625112 |

|                    |                    |                    |
|--------------------|--------------------|--------------------|
| 0.5298986216765051 | 0.3343347965581882 | 0.3237900443516605 |
| 0.5597843107733375 | 0.3137837409549085 | 0.5634302725417492 |
| 0.0566419638494632 | 0.8127234795548236 | 0.5623898132274517 |
| 0.3676024446220444 | 0.9530194953228996 | 0.6869191883476790 |
| 0.8721923656219442 | 0.4514003861042827 | 0.6842104398371799 |
| 0.9669247762368751 | 0.2151871098066956 | 0.5799123463174033 |
| 0.4598533751890118 | 0.9296873507209181 | 0.3250921371284918 |
| 0.9640072754653279 | 0.4285174295622071 | 0.3264624415502673 |
| 0.4842763629907836 | 0.7126870508333581 | 0.5725018286655951 |
| 0.2203282434467276 | 0.5586286532959402 | 0.4632395145336762 |
| 0.2132357656239085 | 0.0900808099098079 | 0.4166971987407035 |
| 0.7187569436520951 | 0.5877966970704930 | 0.4157928775439750 |
| 0.7196033329703496 | 0.0577435361458931 | 0.4546783980120410 |
| 0.7467026712954729 | 0.5730059609704806 | 0.6653389619996564 |
| 0.1829362347846108 | 0.8235932258293432 | 0.4391585012488174 |
| 0.6834536454064375 | 0.3269268588792140 | 0.4389749723385316 |
| 0.2552043534407252 | 0.0695682162348636 | 0.6586724543282507 |
| 0.4695574147639502 | 0.1843558869097252 | 0.5454160090919670 |
| 0.9673337475151644 | 0.9696328189831954 | 0.3440048550324374 |
| 0.4643405559916867 | 0.4704661932641478 | 0.3513332692880350 |
| 0.9634318355215029 | 0.6807579400410255 | 0.5450979284703318 |
| 0.2122173933102603 | 0.8411817154703355 | 0.6580910464591551 |
| 0.2322646523884389 | 0.3009510453485431 | 0.6747849005998088 |
| 0.7350521798089243 | 0.8026813660963381 | 0.6750330226730661 |
| 0.7222282714281424 | 0.3463953044313417 | 0.6544349059678702 |
| 0.6835687613812899 | 0.8245234808664587 | 0.4347649265968200 |

|                    |                    |                    |
|--------------------|--------------------|--------------------|
| 0.2444520607364438 | 0.5793984891796600 | 0.6806309663474372 |
| 0.7516037547875610 | 0.0759492345449039 | 0.6673817327759725 |
| 0.1800074316663479 | 0.3242106577117633 | 0.4426044715563091 |
| 0.9610278521902113 | 0.1990425275723377 | 0.3351544964772782 |
| 0.4705052702573795 | 0.9449301973274212 | 0.5646468612509968 |
| 0.9712585334625837 | 0.6980168248636490 | 0.3338244876798082 |
| 0.4623853019134489 | 0.4483533089906176 | 0.5709245299922611 |
| 0.9635610820544519 | 0.9478242301150267 | 0.5606986430873229 |
| 0.4622584510062325 | 0.6975201536773009 | 0.3329251726050141 |
| 0.9670235641609777 | 0.4505573755778400 | 0.5639867987129267 |
| 0.4671159301217667 | 0.1995964508618012 | 0.3359826997339900 |
| 0.2227486392762425 | 0.7498855331384161 | 0.8838806425205453 |
| 0.1820513456449594 | 0.8203039262647889 | 0.8575350556740626 |
| 0.2634507808799897 | 0.6795625333474085 | 0.9095911182312229 |

**Table S10** Optimized fractional coordinates of In-CO<sub>2</sub> adsorption on Zr<sub>3</sub>-In<sub>2</sub>O<sub>3</sub>(110) surface.

O In Zr In C O

|                     |                     |                     |
|---------------------|---------------------|---------------------|
| 1.0000000000000000  |                     |                     |
| 10.2136999999999993 | 0.0000000000000000  | 0.0000000000000000  |
| 0.0000000000000009  | 14.4443000000000001 | 0.0000000000000000  |
| 0.0000000000000010  | 0.0000000000000010  | 15.9873999999999992 |

|    |    |    |    |   |   |
|----|----|----|----|---|---|
| O  | In | Zr | In | C | O |
| 47 | 21 | 1  | 10 | 1 | 2 |

Direct

|                    |                    |                    |
|--------------------|--------------------|--------------------|
| 0.6102945579902306 | 0.1830594574700455 | 0.4324105866453565 |
| 0.1102588833082892 | 0.6787221003036478 | 0.4414327399899445 |
| 0.1137073103593357 | 0.9670738988040625 | 0.4549839040592716 |
| 0.6184605427234491 | 0.4655081378137330 | 0.4431854659369180 |
| 0.3301322099208716 | 0.5819034441789361 | 0.3343906576382373 |
| 0.8294699251446928 | 0.0845354132116788 | 0.3462407112456549 |
| 0.8268663272085262 | 0.5665910899208337 | 0.5338791399687265 |
| 0.3285931082582978 | 0.0668367501533063 | 0.5347785417338192 |
| 0.1081634823758494 | 0.9669022532968998 | 0.6648107500121766 |
| 0.5865171927571744 | 0.4709161393082263 | 0.6597788250091827 |
| 0.3310378425416708 | 0.8165318958932763 | 0.3495547312980398 |
| 0.8364783736244785 | 0.3199502258011601 | 0.3410960644449864 |
| 0.5860000972694659 | 0.6877144227373556 | 0.6823472575674485 |
| 0.1037487987815298 | 0.1840814078908869 | 0.6834756616414104 |
| 0.8369016512896961 | 0.3289992991716258 | 0.5373032637223487 |
| 0.3358563368263235 | 0.8257718037294929 | 0.5447274435009549 |

|                    |                    |                    |
|--------------------|--------------------|--------------------|
| 0.5612562856981622 | 0.6895740156982526 | 0.4547200329649944 |
| 0.0632053975937320 | 0.1986817590146659 | 0.4611133542786591 |
| 0.3866894412844727 | 0.0668383420980975 | 0.3195066277157587 |
| 0.8962823865279432 | 0.5678181922929130 | 0.3187051776281870 |
| 0.8767453515092215 | 0.0846289780477705 | 0.5603617373934434 |
| 0.3580351823006651 | 0.5860688068716073 | 0.5698912278838457 |
| 0.0632034585901801 | 0.4629028378247984 | 0.4459002776593189 |
| 0.5607472861249029 | 0.9585133499843312 | 0.4402415825105654 |
| 0.7950849675920639 | 0.2167140160730199 | 0.6884638709838913 |
| 0.2677555754053189 | 0.4429642394194389 | 0.7052282760086266 |
| 0.8090771101330893 | 0.9380314835661803 | 0.6845369450217273 |
| 0.1072391812606660 | 0.3244272782480807 | 0.3164885218349944 |
| 0.5982149312855153 | 0.8220762902193230 | 0.3106767914802054 |
| 0.6147364376975102 | 0.8385017292354124 | 0.5692391721595725 |
| 0.1119007773449632 | 0.3428889639245715 | 0.5771647102585863 |
| 0.3391521301424850 | 0.4333993648116776 | 0.4547166300769341 |
| 0.8369130479122014 | 0.9290069191746337 | 0.4579751882987860 |
| 0.0958465094531075 | 0.0873814642859004 | 0.3102071020189270 |
| 0.5976248672439500 | 0.5879903194767564 | 0.3019195069318386 |
| 0.8313907965431609 | 0.7213612357908817 | 0.4312644955817617 |
| 0.3340614014663894 | 0.2237064904519532 | 0.4348339942252772 |
| 0.5994987518358654 | 0.0724083447002227 | 0.5810525328401366 |
| 0.0865869413655248 | 0.5728262076318024 | 0.6112280076094679 |
| 0.8596435509135505 | 0.6986304217781764 | 0.6692642750811399 |
| 0.3765142777986099 | 0.2028309493354777 | 0.6676257894986874 |
| 0.0400904263963762 | 0.8358395185955152 | 0.3252843289158846 |

|                    |                    |                    |
|--------------------|--------------------|--------------------|
| 0.5356875964756899 | 0.3340050205927287 | 0.3167419202453285 |
| 0.5608770532544783 | 0.3151855707863603 | 0.5568398008064225 |
| 0.0544004083282821 | 0.8123602715863978 | 0.5599787733686916 |
| 0.3797727331675533 | 0.9573930345472470 | 0.6864195581667006 |
| 0.8552807754719658 | 0.4528208331204704 | 0.6840541848838685 |
| 0.9684733394501175 | 0.2167766992293525 | 0.5830710683247567 |
| 0.4580801374023093 | 0.9308083066137003 | 0.3279975288977560 |
| 0.9689071216719630 | 0.4320047370669962 | 0.3276672024244980 |
| 0.4758531686664449 | 0.7201390858263176 | 0.5716432835808548 |
| 0.2252624067384321 | 0.5591943141116333 | 0.4463443799755912 |
| 0.2181162540866701 | 0.0926314814064035 | 0.4209088317948780 |
| 0.7235856310469457 | 0.5917977279750425 | 0.4123157167922568 |
| 0.7223974666907356 | 0.0594130040768394 | 0.4593238645716999 |
| 0.7356859454668707 | 0.5760937304297945 | 0.6635958003073686 |
| 0.1845302601092832 | 0.8257942425617899 | 0.4457390647132290 |
| 0.6896840724836185 | 0.3222931558489417 | 0.4342535807985307 |
| 0.2493845319576228 | 0.0738489831227631 | 0.6656456095259244 |
| 0.4654903560752942 | 0.1844527491228168 | 0.5451066848419516 |
| 0.9710725723216517 | 0.9726838506036005 | 0.3510407038995410 |
| 0.4755776716619102 | 0.4715423451395767 | 0.3355452951998139 |
| 0.9569538432577606 | 0.6866300038770206 | 0.5481044752091044 |
| 0.2262537865411925 | 0.8408733302175960 | 0.6748604224742566 |
| 0.2288778159337555 | 0.3012266137086463 | 0.6792213534296215 |
| 0.7234164955988097 | 0.8069778164046291 | 0.6778729528970122 |
| 0.7132347991023305 | 0.3451565835827011 | 0.6530181657707469 |
| 0.6842674561101620 | 0.8284603028370253 | 0.4376494732239296 |

|                    |                    |                    |
|--------------------|--------------------|--------------------|
| 0.2448708488530616 | 0.5685754715095521 | 0.6731856372736609 |
| 0.7504365158686360 | 0.0770264250973482 | 0.6700932128095864 |
| 0.1826193977817878 | 0.3267384564048830 | 0.4453394378716080 |
| 0.9674714507748222 | 0.2008431177360832 | 0.3374529513552723 |
| 0.4661658845188944 | 0.9519375836948599 | 0.5648528822124154 |
| 0.9756389965107460 | 0.7018660547583755 | 0.3356941432140827 |
| 0.4840885259328078 | 0.4535439562405207 | 0.5483342382842542 |
| 0.9723778497287884 | 0.9488993986576246 | 0.5674504261825138 |
| 0.4664725401097133 | 0.7013066239537418 | 0.3313198440744096 |
| 0.9611179549134728 | 0.4511138579847193 | 0.5665779994525462 |
| 0.4678353883960882 | 0.1999310132095798 | 0.3335879970670099 |
| 0.2192027972029159 | 0.6922967901585286 | 0.8554026164307919 |
| 0.2122972461897115 | 0.7562793250512164 | 0.8993124012453068 |
| 0.2263777923472372 | 0.6218988729099352 | 0.8171706151265161 |



**Table S11** Optimized fractional coordinates of bt-CO<sub>2</sub> direct adsorption on In<sub>2</sub>O<sub>3</sub>(110) surface.

O In C O

|                    |                    |                    |
|--------------------|--------------------|--------------------|
| 1.000000000000000  |                    |                    |
| 10.213699999999993 | 0.000000000000000  | 0.000000000000000  |
| 0.0000000000000009 | 14.444300000000001 | 0.000000000000000  |
| 0.0000000000000010 | 0.0000000000000010 | 15.987399999999992 |

O In C O

|    |    |   |   |
|----|----|---|---|
| 47 | 32 | 1 | 2 |
|----|----|---|---|

Direct

|                    |                    |                    |
|--------------------|--------------------|--------------------|
| 0.6084690587952035 | 0.1838017386999686 | 0.4327237510684133 |
| 0.1079684759895802 | 0.6845498411455422 | 0.4386789118438360 |
| 0.1095635346019860 | 0.9653325609011817 | 0.4535961181184223 |
| 0.6092511777524131 | 0.4670550753765417 | 0.4541046509130552 |
| 0.3233509475070132 | 0.5854596512705298 | 0.3501688692166418 |
| 0.8254550430449735 | 0.0832709352599055 | 0.3433170617779497 |
| 0.8259160993633862 | 0.5663989995105753 | 0.5344796341222922 |
| 0.3276642538037153 | 0.0646813294781423 | 0.5314980383863275 |
| 0.0949467933344737 | 0.9785726425403772 | 0.6627753000207726 |
| 0.6031481524961878 | 0.4685213386868018 | 0.6660169611995801 |
| 0.3290250199435969 | 0.8206136785117810 | 0.3481146941892552 |
| 0.8282230189612090 | 0.3201742788548366 | 0.3435901150882854 |
| 0.6012401054567842 | 0.6870855171789427 | 0.6829938060342026 |
| 0.1016906340455488 | 0.1858643208391079 | 0.6823386874740791 |
| 0.8353195046985638 | 0.3297537916686596 | 0.5367422604965059 |
| 0.3343943174400577 | 0.8252797825630005 | 0.5449860251730266 |

|                    |                    |                    |
|--------------------|--------------------|--------------------|
| 0.5606410715671140 | 0.6960939633688876 | 0.4576227722416627 |
| 0.0607641148380010 | 0.1971075645070103 | 0.4583927581405056 |
| 0.3884995866074149 | 0.0682817960341885 | 0.3171906753369894 |
| 0.8887318262973990 | 0.5678815974145726 | 0.3191816322830794 |
| 0.8733001998612085 | 0.0870940674984590 | 0.5560048817835282 |
| 0.3698503668634283 | 0.5874121796548979 | 0.5714358979253077 |
| 0.0613563111895397 | 0.4600838944388908 | 0.4396573504464824 |
| 0.5598682906744979 | 0.9587250325139973 | 0.4395812517363589 |
| 0.7990743538008811 | 0.2161369212234712 | 0.6881448750728107 |
| 0.3240418556293397 | 0.4240537474085296 | 0.6771808675876647 |
| 0.8108216281044348 | 0.9383986316368262 | 0.6782314433118820 |
| 0.0973767524967984 | 0.3212722500425631 | 0.3123534090499615 |
| 0.5953017177819842 | 0.8214136857493608 | 0.3113052435777400 |
| 0.6102793554426155 | 0.8391927831994971 | 0.5726205069495311 |
| 0.1077396388086575 | 0.3393944514740566 | 0.5735621509770671 |
| 0.3338517626039236 | 0.4299825350737350 | 0.4612367003449134 |
| 0.8330978218126168 | 0.9284379340240592 | 0.4561094184831854 |
| 0.0920561259502150 | 0.0858470536226345 | 0.3092319104750114 |
| 0.5896751124116663 | 0.5860381274859846 | 0.3092873956578381 |
| 0.8301070485220546 | 0.7215692568146234 | 0.4348912060538102 |
| 0.3299416024012746 | 0.2223337410862283 | 0.4337263407888048 |
| 0.5983361547557613 | 0.0712411792953039 | 0.5810737896237481 |
| 0.0992658697124419 | 0.5683463183446567 | 0.5846824384368727 |
| 0.8719850867659839 | 0.6986530524075351 | 0.6682552004482025 |
| 0.3764505593285115 | 0.1969640868086642 | 0.6655596822804273 |
| 0.0325804990096872 | 0.8346437523392357 | 0.3218819404369598 |

|                    |                    |                    |
|--------------------|--------------------|--------------------|
| 0.5290816782751795 | 0.3369647810416613 | 0.3218439511685359 |
| 0.5609616044349842 | 0.3132631920628103 | 0.5609150377159473 |
| 0.0576863996969173 | 0.8153304279287211 | 0.5660447672462992 |
| 0.3704587223997582 | 0.9589386840148979 | 0.6832486988712876 |
| 0.8717714088192692 | 0.4523827225727763 | 0.6837478361399757 |
| 0.9675378304415774 | 0.2185320122158475 | 0.5804082658379800 |
| 0.4596964625392131 | 0.9320905192459069 | 0.3263881248112293 |
| 0.9612686933789151 | 0.4314501599857142 | 0.3269321120544135 |
| 0.4744140149312320 | 0.7155240104196025 | 0.5785047984776687 |
| 0.2208427744046844 | 0.5607917421568690 | 0.4657136858798693 |
| 0.2144592075782809 | 0.0923988623028596 | 0.4193057573081723 |
| 0.7159528170051713 | 0.5917238002025154 | 0.4190148831171842 |
| 0.7196002315173928 | 0.0601066914458764 | 0.4570282064201874 |
| 0.7466336269388429 | 0.5746085098927426 | 0.6658203308430012 |
| 0.1830594486078680 | 0.8258598384903235 | 0.4423993291677993 |
| 0.6822024229985272 | 0.3267862669141618 | 0.4387785884419008 |
| 0.2470504364365848 | 0.0786533032754335 | 0.6621270313181797 |
| 0.4656398585432875 | 0.1840179762091053 | 0.5440498973398762 |
| 0.9676157189952661 | 0.9714056521329970 | 0.3481396496334262 |
| 0.4642581989702201 | 0.4731361233338043 | 0.3513742417939644 |
| 0.9656953916481315 | 0.6832361128386192 | 0.5485175115765111 |
| 0.2147615458692205 | 0.8613555782500962 | 0.6559656129076641 |
| 0.2308900039026817 | 0.2990725233739661 | 0.6740444948389657 |
| 0.7314037285987370 | 0.8043425562841402 | 0.6756661381071545 |
| 0.7211382843723314 | 0.3468901407210790 | 0.6545294236354102 |
| 0.6797922616406122 | 0.8265791131037925 | 0.4397295315375052 |

|                    |                    |                    |
|--------------------|--------------------|--------------------|
| 0.2423682745603409 | 0.5555215747395812 | 0.6826713332117896 |
| 0.7519454810971521 | 0.0782672980487176 | 0.6675807831469170 |
| 0.1792696197890850 | 0.3275844921883585 | 0.4417350209142011 |
| 0.9616861495459094 | 0.2008985768508972 | 0.3367852228490316 |
| 0.4675175771442253 | 0.9517474543240569 | 0.5637420128145375 |
| 0.9690823923610972 | 0.7004767872095679 | 0.3375440506887336 |
| 0.4676047011793222 | 0.4484678322144493 | 0.5676371603009951 |
| 0.9630323879526395 | 0.9501307838299016 | 0.5636122615714237 |
| 0.4604508925088022 | 0.7009187954680662 | 0.3366446256319579 |
| 0.9643156574102826 | 0.4518521214934090 | 0.5625250977865022 |
| 0.4663572170527779 | 0.2019274666584315 | 0.3346246162374489 |
| 0.2192932229664544 | 0.6827460521645045 | 0.7599812474040130 |
| 0.1487697644290092 | 0.7004698038610110 | 0.8185553619943013 |
| 0.2879830385858881 | 0.7397745745790649 | 0.7126266746850746 |

**Table S12** Optimized fractional coordinates of bt-CO<sub>2</sub> direct adsorption on Zr1-In<sub>2</sub>O<sub>3</sub>(110) surface.

O In Zr In C O

|                     |                     |                     |
|---------------------|---------------------|---------------------|
| 1.0000000000000000  |                     |                     |
| 10.2136999999999993 | 0.0000000000000000  | 0.0000000000000000  |
| 0.0000000000000009  | 14.4443000000000001 | 0.0000000000000000  |
| 0.0000000000000010  | 0.0000000000000010  | 15.9873999999999992 |

|    |    |    |    |   |   |
|----|----|----|----|---|---|
| O  | In | Zr | In | C | O |
| 47 | 11 | 1  | 20 | 1 | 2 |

Direct

|                    |                    |                    |
|--------------------|--------------------|--------------------|
| 0.6089155580447762 | 0.1844852286429631 | 0.4334007758926425 |
| 0.1083177177693073 | 0.6853155907618728 | 0.4396662426090639 |
| 0.1087790325437481 | 0.9663142060725063 | 0.4519781328326461 |
| 0.6086073915352970 | 0.4678610693283292 | 0.4544369636907664 |
| 0.3227047519614465 | 0.5850923944333206 | 0.3507040707820742 |
| 0.8241112974388074 | 0.0833479356935844 | 0.3409989316231071 |
| 0.8253181428112712 | 0.5664108191162632 | 0.5349725882461724 |
| 0.3177696971531128 | 0.0638193728755939 | 0.5374525104999224 |
| 0.1016660910282136 | 0.9844300440896225 | 0.6542746124454223 |
| 0.6035782523416550 | 0.4693202372379531 | 0.6671425054261862 |
| 0.3302751451188489 | 0.8196561312286891 | 0.3490667608578475 |
| 0.8296567203143973 | 0.3205353380441495 | 0.3425546274555836 |
| 0.6029175491021574 | 0.6874542064858168 | 0.6843501922227173 |
| 0.1087508878253718 | 0.1786134359313654 | 0.6776730812615553 |

|                    |                    |                    |
|--------------------|--------------------|--------------------|
| 0.8347670711079609 | 0.3304290164853288 | 0.5362381939482276 |
| 0.3360215388838836 | 0.8277349444918943 | 0.5473744981159475 |
| 0.5609546054085905 | 0.6961633985564114 | 0.4575994411103353 |
| 0.0601803727673317 | 0.1962314821724626 | 0.4576115583199876 |
| 0.3854154938650862 | 0.0678985905024826 | 0.3211600866057088 |
| 0.8897446803958154 | 0.5673546066302469 | 0.3197880653694334 |
| 0.8685304141628880 | 0.0869081031288462 | 0.5546803903471551 |
| 0.3696644689733652 | 0.5882425218699406 | 0.5726423480159821 |
| 0.0617807809777230 | 0.4589979487511511 | 0.4404936827957052 |
| 0.5577881004383098 | 0.9591076152529643 | 0.4407061419262686 |
| 0.8018812831524447 | 0.2164470796607808 | 0.6869249903994226 |
| 0.3224485888314418 | 0.4242518680258767 | 0.6784714923918045 |
| 0.8139634746823212 | 0.9385465519942213 | 0.6770991975629809 |
| 0.1005053450726723 | 0.3206658654557146 | 0.3131163649123882 |
| 0.5959981288963380 | 0.8216021384871310 | 0.3112423876133857 |
| 0.6135333989747301 | 0.8383789334570562 | 0.5733341981195126 |
| 0.1050379989234091 | 0.3372207006184009 | 0.5750052648324964 |
| 0.3335939052475052 | 0.4294227077395287 | 0.4628550236682034 |
| 0.8319416707748487 | 0.9285848284327256 | 0.4536928109548521 |
| 0.0900793039133269 | 0.0862960902192239 | 0.3065732669434230 |
| 0.5894461937952709 | 0.5860001243342690 | 0.3090225384432249 |
| 0.8313401884798128 | 0.7213701179301162 | 0.4346721726869840 |
| 0.3313599690163307 | 0.2196204455764051 | 0.4377443263308002 |

|                    |                    |                    |
|--------------------|--------------------|--------------------|
| 0.5917646461901336 | 0.0710614801229849 | 0.5836775347747112 |
| 0.0992451746137469 | 0.5682287250156525 | 0.5849910139897775 |
| 0.8745214323682979 | 0.6982692208232314 | 0.6686803225790737 |
| 0.3731989784207136 | 0.1955487916975229 | 0.6648394881839959 |
| 0.0341170420425400 | 0.8348164760564355 | 0.3218961117308448 |
| 0.5289027657627235 | 0.3373810417510032 | 0.3236162368372976 |
| 0.5621788324966993 | 0.3148406772806877 | 0.5624306896437061 |
| 0.0566085917165906 | 0.8168226535016796 | 0.5663722174158000 |
| 0.3663721537330939 | 0.9621192462869322 | 0.6866928261861018 |
| 0.8731502901071051 | 0.4523547586703728 | 0.6843386111986467 |
| 0.9650605175996426 | 0.2175940580532353 | 0.5792508530434606 |
| 0.4594686992241230 | 0.9316020923088465 | 0.3259394694826045 |
| 0.9640628674632109 | 0.4313268596779586 | 0.3261567440896805 |
| 0.4774499500715063 | 0.7146145516539508 | 0.5789649670151029 |
| 0.2204192670691031 | 0.5605881013569325 | 0.4660503657496719 |
| 0.2126271975068337 | 0.0922486843801120 | 0.4163134836646250 |
| 0.7173117623430924 | 0.5911941535125131 | 0.4180875146934979 |
| 0.7187146071220791 | 0.0600554857807567 | 0.4542708313353385 |
| 0.7481347937402328 | 0.5747183476247252 | 0.6669738554462623 |
| 0.1821543502208365 | 0.8268317070067837 | 0.4406952230948462 |
| 0.6834569033940655 | 0.3284082984226032 | 0.4375619577806427 |
| 0.2557479763416748 | 0.0762114829243510 | 0.6571846478974150 |
| 0.4697302234962387 | 0.1870093269633976 | 0.5433787407268749 |

|                    |                    |                    |
|--------------------|--------------------|--------------------|
| 0.9663271928613155 | 0.9714598798238155 | 0.3449865595768215 |
| 0.4634643685889119 | 0.4734137925497839 | 0.3513035098475348 |
| 0.9650065232009234 | 0.6830720255436996 | 0.5478918710178657 |
| 0.2108621153114538 | 0.8589122437642430 | 0.6547755145852939 |
| 0.2283020572426707 | 0.2999632243703159 | 0.6748038303481418 |
| 0.7343832115603895 | 0.8038424628562216 | 0.6773023888441276 |
| 0.7224262768137292 | 0.3479111203019397 | 0.6552071615351546 |
| 0.6804470502586785 | 0.8256874576230052 | 0.4385833083326820 |
| 0.2415145531755404 | 0.5566488501137212 | 0.6833474067590252 |
| 0.7505072003075410 | 0.0783979344110158 | 0.6679933219490813 |
| 0.1796275382074005 | 0.3267551482189904 | 0.4425405050454907 |
| 0.9610453910638564 | 0.2012055226598329 | 0.3349369918340162 |
| 0.4715150095571905 | 0.9485104284127392 | 0.5649198213088937 |
| 0.9703199858658185 | 0.7002158817958964 | 0.3365350687799926 |
| 0.4685402022382829 | 0.4497921465735564 | 0.5682392230135331 |
| 0.9591458953558963 | 0.9503481444864901 | 0.5612442006648910 |
| 0.4606589739531019 | 0.7003046367069830 | 0.3361298392230105 |
| 0.9637032009788156 | 0.4520037530003510 | 0.5624635478986336 |
| 0.4654816923662272 | 0.2022852732542585 | 0.3344793082166001 |
| 0.2171570221965589 | 0.6828272872387360 | 0.7619910304713939 |
| 0.1463224048140672 | 0.6998727473966513 | 0.8205797255207160 |
| 0.2856878993075322 | 0.7417921283098751 | 0.7156917214072148 |



**Table S13** Optimized fractional coordinates of bt-CO<sub>2</sub> direct adsorption on Zr3-In<sub>2</sub>O<sub>3</sub>(110) surface.

| O                   | In                  | Zr | In | C | O                   |
|---------------------|---------------------|----|----|---|---------------------|
| 1.0000000000000000  |                     |    |    |   |                     |
| 10.2136999999999993 | 0.0000000000000000  |    |    |   | 0.0000000000000000  |
| 0.0000000000000009  | 14.4443000000000001 |    |    |   | 0.0000000000000000  |
| 0.0000000000000010  | 0.0000000000000010  |    |    |   | 15.9873999999999992 |

| O  | In | Zr | In | C | O |
|----|----|----|----|---|---|
| 47 | 21 | 1  | 10 | 1 | 2 |

Direct

|                    |                    |                    |
|--------------------|--------------------|--------------------|
| 0.6089391584802151 | 0.1832215242632301 | 0.4324231271352099 |
| 0.1099005032714492 | 0.6810155829789972 | 0.4414425594746682 |
| 0.1117132124651637 | 0.9660098036527071 | 0.4551490484676434 |
| 0.6160915255106182 | 0.4660204735154483 | 0.4453985858506760 |
| 0.3279019113579681 | 0.5836136550155037 | 0.3411729012400146 |
| 0.8281421065518797 | 0.0838681794503132 | 0.3448693144731413 |
| 0.8261218565475493 | 0.5660136667758359 | 0.5332973141469575 |
| 0.3280825584555491 | 0.0654012763085002 | 0.5342202263759208 |
| 0.0996655099154817 | 0.9738986905775018 | 0.6646173453423888 |
| 0.5910570189034947 | 0.4700157272475367 | 0.6615674788751752 |
| 0.3320328828791506 | 0.8182954634329530 | 0.3493543763190900 |
| 0.8342540189943620 | 0.3198014243686990 | 0.3411589281421897 |
| 0.5950041299817485 | 0.6872074045331124 | 0.6820127397193126 |
| 0.1013224683167497 | 0.1843646987268387 | 0.6836778867574052 |
| 0.8352692863423785 | 0.3284728011700078 | 0.5364549439660106 |
| 0.3360868738173373 | 0.8245867000838771 | 0.5451926274602144 |

|                    |                    |                    |
|--------------------|--------------------|--------------------|
| 0.5625610886014207 | 0.6922721909394011 | 0.4553678841728543 |
| 0.0622962734662049 | 0.1975221101148489 | 0.4600770373418245 |
| 0.3867696729885923 | 0.0671767825537002 | 0.3192183952007744 |
| 0.8944552205721341 | 0.5675374252217592 | 0.3188095896292658 |
| 0.8741838758563770 | 0.0861267320455544 | 0.5581681110096088 |
| 0.3649380110054130 | 0.5860170579554723 | 0.5712961560464550 |
| 0.0626335865246369 | 0.4616680120837582 | 0.4434213026694762 |
| 0.5609179018944548 | 0.9586899807624731 | 0.4398956949584686 |
| 0.7963565400891953 | 0.2169897275210843 | 0.6882801746295359 |
| 0.2731242696602738 | 0.4361708444332658 | 0.7084773359273216 |
| 0.8104672956845379 | 0.9381703925398107 | 0.6796951142170555 |
| 0.1048585812654110 | 0.3228420717591947 | 0.3154305884134071 |
| 0.5984265157512704 | 0.8220020430188157 | 0.3107366372536561 |
| 0.6130495315252221 | 0.8387469450063351 | 0.5706977818535779 |
| 0.1108386205145147 | 0.3410199418987278 | 0.5761132084940412 |
| 0.3372431805394459 | 0.4324653658194476 | 0.4577830994844367 |
| 0.8355309341748322 | 0.9285041951582041 | 0.4569548582991978 |
| 0.0948309042826476 | 0.0863222192041321 | 0.3099826357499044 |
| 0.5948300618748176 | 0.5875126888028021 | 0.3040474811043302 |
| 0.8329034001346827 | 0.7217604183148218 | 0.4324122013378402 |
| 0.3325357384581554 | 0.2228103379501410 | 0.4349633942570792 |
| 0.5979211083117569 | 0.0723596578417641 | 0.5819441809395846 |
| 0.0911914527133736 | 0.5685569418915780 | 0.5992386479738737 |
| 0.8663068057501626 | 0.6983811524862570 | 0.6672897003797862 |
| 0.3744094553811942 | 0.2012230077362669 | 0.6669784801363291 |
| 0.0393893047571373 | 0.8351348553602207 | 0.3250744522621506 |

|                    |                    |                    |
|--------------------|--------------------|--------------------|
| 0.5324763354703922 | 0.3351728105015735 | 0.3189019098135736 |
| 0.5600401915443878 | 0.3149269375758378 | 0.5578777990228321 |
| 0.0585314822488579 | 0.8140026376922710 | 0.5645723427715490 |
| 0.3727637191361615 | 0.9559159492861380 | 0.6845317707971256 |
| 0.8600077429297751 | 0.4520789322349154 | 0.6831142810004457 |
| 0.9680914707264479 | 0.2174490764563211 | 0.5819644020584041 |
| 0.4601880778425106 | 0.9316400150551402 | 0.3265344430525598 |
| 0.9673927507387616 | 0.4314341186131988 | 0.3265657401516628 |
| 0.4773374633124595 | 0.7172856298083299 | 0.5743168859014155 |
| 0.2232838073079895 | 0.5595224952948671 | 0.4539743778385598 |
| 0.2168219365801030 | 0.0920254707753509 | 0.4205297199284029 |
| 0.7222926630150311 | 0.5919535231820990 | 0.4136891244881540 |
| 0.7211995682448294 | 0.0600240029566799 | 0.4580586724796959 |
| 0.7407601527054957 | 0.5752990949044522 | 0.6645911171307836 |
| 0.1845243046346228 | 0.8260291147564732 | 0.4431842863786399 |
| 0.6871968878128535 | 0.3232423220750433 | 0.4345656168696452 |
| 0.2480219250771421 | 0.0771551453731154 | 0.6643928002268015 |
| 0.4646155416142649 | 0.1847486976483156 | 0.5449306764505530 |
| 0.9699017815396684 | 0.9720897701586497 | 0.3495255943363570 |
| 0.4711241069442130 | 0.4724831786927273 | 0.3399539741281031 |
| 0.9606569614638043 | 0.6851901734611107 | 0.5475975193843524 |
| 0.2180537449468240 | 0.8549895071046814 | 0.6595139718057326 |
| 0.2266996478164083 | 0.3008439497555283 | 0.6806766899272586 |
| 0.7284340086582300 | 0.8054019088768403 | 0.6771263067528258 |
| 0.7146535576617232 | 0.3455835894538702 | 0.6536029909050740 |
| 0.6828008537088415 | 0.8273767276659022 | 0.4383197186823781 |

|                    |                    |                    |
|--------------------|--------------------|--------------------|
| 0.2403540769420207 | 0.5628547004045944 | 0.6743576863080053 |
| 0.7510477470157113 | 0.0780077982865807 | 0.6694909193870086 |
| 0.1815308992237076 | 0.3264758138098092 | 0.4446445254466129 |
| 0.9659930084655483 | 0.2005581030635427 | 0.3367774341056000 |
| 0.4683052689964147 | 0.9520112155504977 | 0.5641396941285801 |
| 0.9744744658385478 | 0.7009835327971772 | 0.3354176046196686 |
| 0.4829358746969593 | 0.4537264857423013 | 0.5519870391500612 |
| 0.9657091728910906 | 0.9495621728482473 | 0.5656430262442799 |
| 0.4651665203347954 | 0.7014462710378427 | 0.3326882988907822 |
| 0.9605063933526893 | 0.4500125093992430 | 0.5640484245918378 |
| 0.4663055636408893 | 0.2005983776618438 | 0.3336765439752706 |
| 0.2016835673474373 | 0.6770825804234217 | 0.7726415709311064 |
| 0.1547765314743685 | 0.7250417296458843 | 0.8269712059143433 |
| 0.2629758725290582 | 0.7171837594486820 | 0.7015697465361327 |
